## 1 Title

2 Genomic analysis reveals geography rather than culture as the predominant factor shaping  
3 genetic variation in northern Kenyan human populations

## 4 Running title

5 Genetics and culture of Kenyan pastoralists

## 6 Authors

7 Angela M. Taravella Oill<sup>1,2</sup>, Carla Handley<sup>3</sup>, Emma K. Howell<sup>1,2</sup>, Anne C. Stone<sup>2,3,4</sup>, Sarah  
8 Mathew<sup>3,4\*</sup>, and Melissa A. Wilson<sup>1,2\*</sup>

9

10 \*Co-corresponding authors

## 11 Affiliations

12 1. School of Life Sciences, Arizona State University, Tempe, AZ 85287 USA

13 2. Center for Evolution and Medicine, Arizona State University, Tempe, AZ 85287 USA

14 3. School of Human Evolution and Social Change, Arizona State University, Tempe, AZ 85287

15 USA

16 4. Institute of Human Origins, Arizona State University, Tempe, AZ 85287, USA

17

18

## 19 Abstract

20 **Objectives:** The aim of this study was to characterize the genetic relationships within and among  
21 four neighboring populations in northern Kenya in light of cultural relationships to understand the  
22 extent to which geography and culture shape patterns of genetic variation.

23 **Materials and Methods:** We collected DNA and demographic information pertaining to aspects  
24 of social identity and heritage from 572 individuals across the Turkana, Samburu, Waso Borana,  
25 and Rendille of northern Kenya. We sampled individuals across a total of nine clans from these  
26 four groups and, additionally, three territorial sections within the Turkana and successfully  
27 genotyped 376 individuals.

28 **Results:** Here we report that geography predominately shapes genetic variation within and  
29 among human groups in northern Kenya. We observed a clinal pattern of genetic variation that  
30 mirrors the overall geographic distribution of the individuals we sampled. We also found relatively  
31 higher rates of intermarriage between the Rendille and Samburu and evidence of gene flow  
32 between them that reflect these higher rates of intermarriage. Among the Turkana, we observed  
33 strong recent genetic substructuring based on territorial section affiliation. Within ethnolinguistic  
34 groups, we found that Y chromosome haplotypes do not consistently cluster by natal clan  
35 affiliation. Finally, we found that sampled populations that are geographically closer have lower  
36 genetic differentiation, and that cultural similarity does not predict genetic similarity as a whole  
37 across these northern Kenyan populations.

38 **Discussion:** Overall, the results from this study highlight the importance of geography, even on  
39 a local geographic scale, in shaping observed patterns of genetic variation in human populations.

## 40 Keywords

41 Africa, Kenya, geography, culture, social organization, genetic structure, genetic  $F_{ST}$ , cultural  $F_{ST}$

## 42 Introduction

43           Among human populations, both geography and culture contribute to modifying patterns  
44 of genetic variation. Gene flow can be constrained by geographic distance (Wright 1943). In  
45 humans, it is commonly observed that as geographic distance between populations increases,  
46 genetic similarity decreases (e.g.,(Manica, Prugnolle, & Balloux, 2005; Novembre et al., 2008;  
47 Ramachandran et al., 2005). In addition to geography, genetic variation and population structuring  
48 are also influenced by cultural factors, like language (e.g., (Hunley et al., 2008; Nettle & Harriss,  
49 2003; Pagani et al., 2012; Sun et al., 2013; Xu et al., 2010)) or social organization (Bose, Platt,  
50 Parida, Drineas, & Paschou, 2021; Chaix et al., 2007; Heyer et al., 2009; Marchi et al., 2017).  
51 Like geographic distance, linguistic distance has been shown to correlate with genetic distance  
52 (Cavalli-Sforza, Piazza, Menozzi, & Mountain, 1988; Nettle & Harriss, 2003).

53           Large scale research efforts have aimed to curate genetic variation across some African  
54 populations to understand population history and human health and disease (e.g., (1000  
55 Genomes Project Consortium et al., 2015; Choudhury et al., 2020; Gurdasani et al., 2015;  
56 Mulindwa et al., 2020; Tishkoff et al., 2009)). However, with more than 2,000 ethnolinguistic  
57 groups across the continent, there is still much to learn about the determinants of substructure  
58 both among and within individual ethnolinguistic groups at smaller geographic scales. For  
59 example, do cultural boundaries play an important role in shaping gene flow among neighboring  
60 groups, or does geography primarily shape patterns of genetic variation, even on a local scale?

61           The Turkana, Samburu, Waso Borana, and Rendille are neighboring pastoral  
62 ethnolinguistic groups inhabiting the semi-arid northern region of Kenya. They herd cattle, camel,  
63 sheep and goat, and migrate over varied distances to access pasture and water. There is intense  
64 competition for scarce dry season grazing and water resources in this region, and armed livestock  
65 raiding occurs especially between communities belonging to different ethnolinguistic groups  
66 (Handley & Mathew, 2020). Marriage across ethnic boundaries particularly between the Rendille

67 and Samburu has been noted (Spencer, 2012). Nomadic pastoralism in all four populations  
68 involves lots of movement of people over large distances, including into one another's territory.  
69 While there are no cultural prescriptions against intermarriage between these groups, historical  
70 and contemporary livestock raiding and resource competition often lead to hostile relationships  
71 between these groups. It is currently unclear whether these tensions contribute to isolation among  
72 these groups, or whether gene flow occurs despite the socio-political barriers.

73 All four groups have lineage-based divisions where individuals are organized into clans  
74 and, for some groups, clans are further grouped into either moieties or phratries (**Figure S1**). The  
75 Turkana, Samburu and Rendille are exogamous at the clan level while the Borana are exogamous  
76 at the moiety level, so for these groups, individuals generally marry outside of their birth clan. In  
77 addition to lineage-based divisions, the Turkana are unique from the other three groups in that  
78 they also have territory-based divisions that cross-cut clan-level organization. There are no  
79 marriage restrictions at the territorial level. This territorial division provides an opportunity to  
80 investigate whether territory-based division impacts substructuring in the Turkana. Detailed  
81 descriptions of the social organization of these populations can be found in (Handley & Mathew,  
82 2020).

83 Each of these groups has a patrilineal descent system where an individual's natal clan  
84 affiliation typically follows that of their father. There are, however, situations in which children do  
85 not take on the clan identity of their biological father. When the biological father is not officially  
86 married, i.e., has yet to pay a bride price to the family of the child's mother at the time of birth, the  
87 child remains affiliated with the natal clan, which is the child's mother's and maternal grandfather's  
88 clan. Households with few children or that have relatively higher material security may adopt a  
89 child, in which case the child takes the clan identity of the adoptive father. Therefore it is unclear  
90 how cultural systems of patrilineal descent shape patterns of male-specific genetic variation within  
91 these groups.

92           In a previous study, two members of this research team sampled 750 individuals from nine  
93   clans across these four ethnic groups, and in the Turkana additionally included three territorial  
94   sections, to obtain data on cultural beliefs and norms, and to quantify levels of cultural  
95   differentiation (cultural  $F_{ST}$ ) among these groups (Handley & Mathew, 2020). Cultural  $F_{ST}$  is the  
96   proportion of the total variation in cultural traits that lie between populations (Bell, Richerson, &  
97   McElreath, 2009; Handley & Mathew, 2020) and can provide a quantitative measure of cultural  
98   similarity between groups. For the current study, we sampled individuals from these same nine  
99   clans and three Turkana territorial sections, which allows us to examine the relationship between  
100   genetic and cultural differentiation.

101           To form a better understanding of the population structure among the Turkana, Samburu,  
102   Rendille, and Waso Borana ethnolinguistic groups and how geography and culture contribute to  
103   shaping genetic variation in northern Kenya, we worked with these local groups to obtain genetic  
104   samples from 572 individuals across all four populations (**Table 1**). We were able to successfully  
105   genotype 376 of the 572 individuals on Illumina's Multi-Ethnic Global Array (**Table S1**). For all  
106   samples, we additionally collected culturally relevant demographic information that included natal  
107   and post-marital affiliations and spoken languages for themselves, parents, and grandparents.  
108   For married men, we additionally collected demographic information for their spouse(s) (e.g.  
109   spouse's ethnic group and natal clan affiliation, etc.). We report here that geography  
110   predominately shapes genetic variation within and among human groups in northern Kenya.  
111   Specifically, we found a clinal pattern of genetic variation that mirrors the overall geographic  
112   distribution of the individuals we sampled. We found evidence of gene flow and relatively higher  
113   rates of intermarriage between the Samburu and Rendille than between any other pair of groups  
114   in our sample. We further observed strong recent genetic substructuring among the Turkana,  
115   based on territorial section affiliation, that did not affect the between-ethnolinguistic group  
116   comparisons. Within ethnolinguistic groups, we found that male Y chromosome haplotypes do not  
117   consistently cluster by natal clan affiliation. Finally, we found that ethnolinguistic groups that are

118 geographically closer have lower genetic differentiation, and that cultural similarity (estimated via  
 119 cultural  $F_{ST}$ ) does not predict genetic similarity as a whole across these four northern Kenyan  
 120 populations. Overall, despite cultural and linguistic differences, our analysis suggests that  
 121 geography is the main driving force of genetic variation, even on a very local geographic scale.

| Ethnolinguistic group | Language genus <sup>a</sup> | Spoken language | Social organization                                                     | Approx. population in Kenya <sup>b</sup> | Clans sampled (sample size) <sup>d</sup>                                                                                                                                                                                       |
|-----------------------|-----------------------------|-----------------|-------------------------------------------------------------------------|------------------------------------------|--------------------------------------------------------------------------------------------------------------------------------------------------------------------------------------------------------------------------------|
| Borana                | Lowland East Cushitic       | Southern Oromo  | 2 exogamous moieties<br>17 clans                                        | 276,236 <sup>c</sup>                     | Noonituu (40)<br>Warrajidaa (40)<br>Other (30)                                                                                                                                                                                 |
| Rendille              | Lowland East Cushitic       | Kirendille      | 2 phratries<br>9 exogamous clans                                        | 96,313                                   | Ldupsai (43)<br>Saale (45)<br>Other (22)                                                                                                                                                                                       |
| Samburu               | Nilotic                     | Northern Maa    | 2 phratries<br>8 exogamous clans                                        | 333,471                                  | Lpisikishu (40)<br>Lukumai (42)<br>Other (27)                                                                                                                                                                                  |
| Turkana               | Nilotic                     | Kiturkana       | 18 territorial sections (TS)<br>24 exogamous clans cross-cutting the TS | 1,016,174                                | Kwatela TS:<br>Ngisiger (24),<br>Ngipongaa (21),<br>Ngidoca (23)<br>Ngiyapakuno TS:<br>Ngisiger (24),<br>Ngipongaa (26),<br>Ngidoca (22)<br>Ngibochoros TS:<br>Ngisiger (21),<br>Ngipongaa (22),<br>Ngidoca (21)<br>Other (38) |

122 **Table 1. Background information on study populations and collected samples.** We sampled  
 123 a total of 572 individuals in northern Kenya. Here, we describe general background information  
 124 on the four study populations, including information on language, social organization, and  
 125 population sizes in Kenya. This table was adapted from (Handley and Mathew 2020) but altered  
 126 to reflect sample sizes collected in the current study. <sup>a</sup>Language information reported here is  
 127 based on assignments from the *World Atlas of Languages (WALS) Online*. <sup>b</sup>Population sizes  
 128 reported here were obtained from the 2019 census report of the *Kenya National Bureau of*

129 *Statistics*. <sup>c</sup>Borana extend into Ethiopia so their total population exceeds the numbers living in  
130 Kenya. <sup>d</sup>Sample numbers are based on natal affiliations. Since we opportunistically sampled in  
131 these regions, we also sequenced individuals beyond the targeted clans and territories and these  
132 samples are marked as “Other” here. One individual was from the Gabbra ethnic group and not  
133 included in this table.

## 134 Materials and Methods

### 135 Community engagement and ethics

136 Both SM and CH have worked in Northern Kenya for over a decade and have established  
137 and maintained a strong relationship with the local communities. Research with the Turkana,  
138 Borana, Rendille, and Samburu has expanded to include genetic analyses and great care has  
139 been taken to ensure ethical informed consent, data collection, outreach communication, and  
140 data sharing.

141 Subsequent to obtaining the appropriate research permitting through Kenya’s National  
142 Commission for Science, Technology and Innovation (NACOSTI), yet prior to commencing any  
143 data collection, the field teams spent a considerable period of time with each local community and  
144 its leaders to sensitize individuals to the purpose and process of collecting genetic samples for  
145 this study. Other than SM and CH, field teams were composed solely of individuals from the  
146 participant communities, many of whom had been working with SM and CH for several years.  
147 Research assistants (RAs) and guides worked within their own ethnic groups, therefore having  
148 one team per group, and all information was presented to participants using local languages. As  
149 a key goal of any informed consent process, potential subjects must demonstrate sufficient  
150 comprehension of the methods and underlying scientific principles on which to base their decision  
151 to participate. With literacy rates for northeastern Kenya estimated below 10% of the adult

152 population (Kebathi, 2008) explaining fundamental concepts regarding DNA, genetic data sample  
153 collection, and data sharing was of paramount importance. For each area surveyed, teams met  
154 with the responsible county/deputy commissioners, local/assistant chiefs, and/or community  
155 elders councils to explain the purpose of the study and to obtain permissions from the appropriate  
156 bodies. As data collection began, RAs discussed the study, its purpose, methodologies, and  
157 underlying scientific principles to each eligible participant and provided ample time for participants  
158 to ask questions and address any concerns. At this time, there was an estimated drop-out rate of  
159 20% of eligible participants. For those remaining, we transitioned to the formal consent process,  
160 where the objectives, methods, and benefits of the study would be repeated before asking a  
161 subject to sign or mark the consent form. At this stage, there was an additional estimated 15%  
162 drop-out of eligible participants. Those who agreed to take part in the study were provided with  
163 the contact information for both local and foreign research team members in the event that s/he  
164 should choose to be removed from the study at any future point. Furthermore, despite the  
165 common practice in many locations of husbands granting permission for themselves and for their  
166 wives, permissions were obtained explicitly and directly from all female participants. However, the  
167 research teams made efforts to avoid households where directly soliciting female participation  
168 could transgress cultural norms and inadvertently introduce additional domestic concerns.

169         Once obtaining consent for participation, research assistants demonstrated the cheek cell  
170 swab collection procedure, using a clean swab on themselves to scrub the inside of their own  
171 cheeks. Our initial intention was for RAs to swab the participants' mouths; however, we found that  
172 participants felt more comfortable being in control of the process to swab their own mouths. This  
173 required oversight from the RAs to ensure that the swab was oriented in the appropriate direction,  
174 did not come into contact with foreign bodies, and that enough pressure and effort were applied  
175 during the collection. Furthermore, we requested that participants rinse their mouths with water if  
176 they recently had been chewing tobacco or other organic products. Satisfactory swabs were  
177 handed to the RAs to seal within the collection tube and returned to CH for cool bag storage. After



178 sample collection, participants were asked to respond to a 10-15 minute survey, developed in  
179 ONA and implemented in the field through Online Data Kit (ODK) using handheld Samsung  
180 tablets. The survey requested permission to record the GPS locations of participants along with  
181 questions regarding the biological and cultural kinship lineages of the participants with a resolution  
182 to both maternal and paternal grandparents, along with languages spoken within each family  
183 household.

184 In 2018, AMTO traveled to Turkana to present outreach materials and discuss initial  
185 findings. We worked with VizLab graphic design studio at ASU to make a series of images to help  
186 explain what DNA is, how to get DNA from a cell, what can be learned about people and human  
187 history with DNA, and preliminary results from this genetic study (**Figure S2**). Along with the  
188 images, we created a script to explain, in layman's terms, what the images mean; we also had  
189 questions to ask at the end of the presentation to make sure participants were following and  
190 understanding what we were demonstrating to them. We worked with the local field assistants to  
191 translate the script into the local language and to present the script to the community. We  
192 presented to a total of 6 settlement areas across 3 territorial sections in Turkana County, Kenya.  
193 Overall, the presentations were well received by the communities, and people expressed interest  
194 in the results. Some people also expressed their excitement about wanting to know what else we  
195 would find from their DNA. Additional dissemination from our group will occur in the near future  
196 as it becomes safer to travel.

197 The Turkana, Rendille, Samburu, and Borana are small-scale pastoral populations in  
198 northern Kenya. We are therefore taking measures to ensure the protection of these groups by  
199 providing the genetic data generated here as controlled access while maintaining appropriate  
200 standards of data access. The genomic data generated here will be available through dbGap.

## 201 Sampling and sequencing

202 We collected DNA and demographic information from a total of 572 individuals from  
203 Turkana, Samburu, Rendille, and Waso Borana and successfully genotyped 376 of these  
204 individuals on Illumina's Multi-Ethnic Global Array (**Table 1; Table S1**). For each ethnolinguistic  
205 group, we sampled individuals from at least two clans. Data collection occurred across northern  
206 Kenya from October 2016 – October 2017. For each participant, a DNA sample was taken in the  
207 form of saliva or cheek swab; the saliva was collected in an Oragene OG-500 DNA collection kit.  
208 In addition to collecting a DNA sample, a questionnaire was administered to each participant to  
209 acquire demographic information; this information included, for example, natal and post-marital  
210 clan affiliation, and spoken languages. DNA was extracted using a phenol-chloroform extraction  
211 method for the samples collected from cheek swabs. DNA for the samples collected with the  
212 Oragene OG-500 DNA collection kit was extracted at Yale Center for Genomic Analysis. The  
213 extracted DNA was then quantified on both a Qubit and Nanodrop. Each sample's extracted DNA  
214 was then diluted to at least 35 ng/ul in a volume of 40 ul and sent to Langebio-Cinvestav  
215 sequencing facility in Mexico for SNP genotyping on Illumina's Multi-Ethnic Global Array.

## 216 Quality control and filtering

217 We received the SNP genotype data in the form of a raw plink file. The coordinates were  
218 mapped to the human reference genome hg19. Initially, there were a total of 1,779,819 markers  
219 genotyped on the array. Sites with no valid mapping for the probe or with more than 1 best-scoring  
220 mapping for the probe were removed from our analyses. Additionally, we removed any sites  
221 marked as insertions or deletions. There were 27,089 duplicated variants in this file; duplicated  
222 variants have the same chromosome number and position and can have the same or different  
223 allele codes. Duplicated variants with the same chromosome, position, and allele codes were  
224 merged, while duplicated variants with the same chromosome and positions, but different allele

225 codes were removed. We merged the duplicated sites using the '--merge-equal-pos' flag and the  
226 default merge mode - which ignores missing calls and sets mismatching genotypes to missing -  
227 using PLINK v1.9 (Chang et al., 2015). There were a total of 1,715,718 sites after filtering.

228 As an additional quality control measure, we inferred the sex chromosome complement of  
229 each individual and compared this information with reported sex information. Two approaches  
230 were used to infer the sex chromosome complement of each individual, one approach based on  
231 the X chromosome inbreeding coefficient (F) and the other approach based on the number of Y  
232 chromosome genotype counts. Since genetic males are expected to have one X chromosome,  
233 they should not have any heterozygous sites on the X chromosome (minus the pseudoautosomal  
234 regions - PARs) and therefore an inbreeding coefficient equal to 1. We used the "--check-sex  
235 ycount" flag in PLINK v1.9 (Chang et al., 2015) to calculate the X chromosome inbreeding  
236 coefficient and the number of Y chromosome genotype counts using. The PARs were excluded  
237 from this calculation.

238 As per the PLINK documentation recommendations, individuals with an X chromosome  
239 inbreeding coefficient greater than 0.8 were considered male, while individuals with an X  
240 chromosome inbreeding coefficient less than 0.2 were considered female. The expectation for  
241 genetic females is that they have no genotype calls on the Y chromosome - since genetic females  
242 are expected to be XX - however, all the female individuals in our data set had genotype calls on  
243 the Y chromosome. We, therefore, visualized the X chromosome inbreeding coefficient and non-  
244 missing Y chromosome genotype counts together to see the distribution of these values in males  
245 and females and to identify any individuals that did not cluster with expected male and female  
246 values. We removed individuals that had discrepancies between these two metrics (**Figure S3**).  
247 A total of 10 individuals were removed.

248 Identity by descent (IBD) was calculated across the autosomes to identify and remove  
249 related individuals. Prior to running the IBD analysis, we filtered sites with missing data across  
250 samples greater than 5% (--geno 0.05 flag in PLINK), sites with Hardy-Weinberg equilibrium p-

251 value threshold less than  $1 \times 10^{-50}$ , and pruned sites for linkage disequilibrium (50 kb window size,  
252 10 kb variant step size, 0.2  $r^2$  threshold). Filtering and IBD were calculated, using PLINK v1.9  
253 (Chang et al., 2015), for all pairwise combinations of samples in our data set and output pairs of  
254 individuals with more than 18% IBD. We removed two samples with 100% IBD that were not  
255 replicate samples (the same sample sequenced twice), as these may reflect contamination. We  
256 had two replicates in this data set and removed one sample from each replicated pair. In the  
257 cases where there were clusters of individuals related, we removed the individuals who were  
258 related to many other individuals, to minimize the number of individuals to remove. In cases where  
259 just two individuals were related, we attempted to remove roughly equal numbers of males and  
260 females when possible. A total of 67 samples were removed, leaving 301 individuals.

261 We next performed an initial principal components analysis (PCA) on the 301 samples  
262 using smartpca, a program within the EIGENSOFT v6.0.1 software package (Price et al., 2006).  
263 We identified a total of 4 outlier samples; these samples were removed from subsequent analyses  
264 (**Figure S4**).

265 After individual filtering, we performed site filtering on the autosomes, Y chromosome, and  
266 mitochondrial DNA. For the autosomes, we removed sites with more than 5% missing data across  
267 individuals at a given site (“--geno 0.05” flag in PLINK/ 95% call rate filter), removed sites that  
268 deviate from Hardy-Weinberg equilibrium (p-value threshold of  $1 \times 10^{-50}$ ), and performed linkage  
269 disequilibrium pruning (50 kb window size, 10 kb variant step size, and 0.2  $r^2$  threshold). For the  
270 Y chromosome and mitochondrial DNA, we removed sites with heterozygous calls, removed sites  
271 with more than 5% missing data across individuals at a given site, and removed sites that deviate  
272 from Hardy-Weinberg equilibrium with a p-value threshold of  $1 \times 10^{-50}$ . After filtering, 516,821,  
273 3,295, and 811 sites remained on the autosomes, Y chromosome, and mitochondrial DNA,  
274 respectively.

## 275 Population genetic analyses

276 To explore the genetic structure within and among northern Kenyan populations, we ran  
277 PCA using smartpca (Price et al. 2006) and ADMIXTURE (Alexander, Novembre, & Lange, 2009)  
278 on the autosomes for all unrelated samples. We ran ADMIXTURE for  $K = 2 - 5$  with a total of 10  
279 replicates for each  $K$  value. For streamlined post analysis and visualization of the different  
280 replication runs and  $K$  values from the ADMIXTURE analysis, we used pong (Behr, Liu, Liu-Fang,  
281 Nakka, & Ramachandran, 2016), an algorithm for processing and visualizing membership  
282 coefficient matrices. Pong finds the best alignment across all runs within and across the different  
283  $K$  values and identifies modes among all runs for each  $K$ . We used the best alignments across all  
284 runs within and across the different  $K$  values for visualization in this manuscript.

285 To quantify genetic differentiation within and among northern Kenyan populations, we  
286 calculated Hudson's  $F_{ST}$  (Hudson, Slatkin, & Maddison, 1992) using the estimator derived in  
287 (Bhatia, Patterson, Sankararaman, & Price, 2013).  $F_{ST}$  was calculated on the autosomes for  
288 ethnolinguistic groups and Turkana territorial sections. Results were visualized in R (R. C. Team  
289 & Others, 2013; R. Team & Others, 2015), using the visualization package, ggplot2 (Wickham,  
290 2011).

291 To test whether genetic  $F_{ST}$  was different between Ngibochoros and at least one of the  
292 ethnolinguistic groups and Kwatela and/or Ngiyapakuno and the same ethnolinguistic group, we  
293 performed a series of permutations. We randomly shuffled samples from two of the territorial  
294 sections, calculated  $F_{ST}$  between the territorial section and ethnolinguistic group, and then  
295 calculated the test statistic which was the absolute difference between  $F_{ST}$  for each territorial  
296 section. We repeated this 1,000 times and calculated the p-value. This was done for all  
297 combinations.

298 To visualize the relationships among haplotypes within each ethnolinguistic group, we  
299 generated haplotype networks for the Y chromosome and mitochondrial DNA. SNPs in our data

300 set were first set to the forward orientation. Sites on the opposite strand were identified using  
301 snpflip (<https://github.com/biocore-ntnu/snpflip>) and flipped using PLINK v1.9 (Chang et al.,  
302 2015). Snpflip uses information from a reference genome fasta sequence and the bim PLINK file  
303 to identify SNPs on the reverse strand. The GRCh37 GENCODE reference genome was used  
304 ([ftp://ftp.ebi.ac.uk/pub/databases/gencode/Gencode\\_human/release\\_30/GRCh37\\_mapping/GR](ftp://ftp.ebi.ac.uk/pub/databases/gencode/Gencode_human/release_30/GRCh37_mapping/GRCh37.primary_assembly.genome.fa.gz)  
305 [Ch37.primary\\_assembly.genome.fa.gz](ftp://ftp.ebi.ac.uk/pub/databases/gencode/Gencode_human/release_30/GRCh37_mapping/GRCh37.primary_assembly.genome.fa.gz)). Any sites unable to be flipped due to ambiguity in  
306 whether the site was on the reverse strand were removed. A total of 2,807 and 806 sites remained  
307 on the Y chromosome and mitochondrial DNA, respectively. PLINK files were then converted to  
308 VCF format using PLINK v.1.9 (Chang et al. 2015). VCF files were converted to FASTA file format  
309 using python and haplotype networks were constructed in R (R. C. Team & Others, 2013; R.  
310 Team & Others, 2015) using pegas (Paradis, 2010) and ape (Paradis & Schliep, 2019) packages.

## 311 Quantification of intermarriage

312 To quantify the amount of intermarriage in the Turkana, Samburu, Rendille, and Waso  
313 Borana, we used questionnaire information collected here and from (Handley & Mathew, 2020).  
314 The questionnaire information we collected in this study requested spouses' ethnolinguistic group  
315 information only for the married men, while the questionnaire information from (Handley &  
316 Mathew, 2020) had spouse information for both married men and women that were sampled. In  
317 these groups, men may marry more than one wife, so rates of marriages were based on the total  
318 number of marriages rather than the number of individuals. For each ethnolinguistic group, we  
319 calculated the percentage of marriages both within the same ethnolinguistic group and from  
320 different ethnolinguistic groups. This was calculated separately for men and women.

## 321 Correlations between genetic and cultural differentiation

322 To test whether measures of genetic similarity can predict cultural similarity, we performed  
323 a series of Pearson's correlations between genetic  $F_{ST}$ , cultural  $F_{ST}$ , geographic distance, and  
324 linguistic distance. We used cultural  $F_{ST}$  values and linguistic distances that were previously  
325 calculated among these ethnolinguistic groups (Handley & Mathew, 2020). Briefly, cultural  $F_{ST}$  is  
326 a measure of cultural similarity between two groups; a low cultural  $F_{ST}$  indicates two groups are  
327 more culturally similar while a higher cultural  $F_{ST}$  indicates two groups are less culturally similar  
328 (Bell et al., 2009). For each group, language, genus, and family information were acquired from  
329 The World Atlas of Language Structures (WALS) database ("WALS Online - Home," n.d.). Using  
330 this information linguistic distances were categorized as follows: a score of 0 for groups that speak  
331 the same language (same language, same genus, same family), a score of 1 for groups that  
332 speak different languages from the same language genus (different language, same genus, same  
333 family), a score of 2 for groups that speak different languages from different genus but within the  
334 same family (different language, different genus, same family), and finally, a score of 3 for groups  
335 that speak different languages from different language families (different language, different  
336 genus, different family). Further details can be found in (Handley & Mathew, 2020). To calculate  
337 geographic distance between groups, we collected GPS coordinate information for the locations  
338 in which genetic sampling occurred. If a household fell within one precision of one or more  
339 households (within 20 meters), only one GPS measure was recorded. Using the latitude and  
340 longitude for each measured household in each population, we calculated the average distance  
341 between pairs of populations in kilometers (km). This involved calculating the distance between  
342 all households from one population to another population and then averaging these distances.  
343 This was computed for all pairs of populations using a custom python script. Pearson correlations  
344 were performed in R (R. C. Team & Others, 2013; R. Team & Others, 2015) using package ppcor  
345 (Kim, 2015) and visualized using ggplot2 (Wickham, 2011).

## 346 Data and code availability

347 The genotype data generated in this manuscript has been deposited on dbGap (dbGap accession  
348 number phs002654.v1.p1) and will be made available upon publication. All original code used in  
349 this manuscript can be found on GitHub: [https://github.com/SexChrLab/Kenya\\_Fst](https://github.com/SexChrLab/Kenya_Fst).

## 350 Results

### 351 Intermarriage among ethnolinguistic groups contributes to the 352 clinal pattern of genetic variation

353 We found a clinal pattern of genetic variation that mirrors the overall geographic  
354 distribution of the individuals we sampled (**Figure 1A, 1B**). In the principal components analysis  
355 (PCA), the Turkana samples separate from the other three groups along PC1, and along PC2 the  
356 Borana samples separate from the Rendille and Samburu (**Figure 1B**). While the Borana samples  
357 form a discrete cluster from the other ethnolinguistic groups, there is overlap between Samburu  
358 and Rendille and some overlap between Samburu and Turkana (**Figure 1B**). Interestingly, many  
359 of the overlapping Samburu and Rendille samples have a family history - a parent and/or  
360 grandparent(s) in the Rendille and Samburu, respectively (**Table S2**). In contrast, the Samburu  
361 sample that falls near Turkana and the Turkana sample that falls near Samburu have no reported  
362 cross-group family history through the grandparent level in these individuals (**Table S2**). We  
363 additionally found high rates of intermarriage between some ethnolinguistic groups and nearly  
364 non-existent intermarriage between others (**Figure 1C**). For Rendille, 5% of female marriages  
365 and 16.4% of male marriages were with a Samburu individual (**Figure 1C**). For Samburu, we  
366 observe almost the exact opposite pattern, with 11.4% of female marriages and 4.8% of male



367 marriages with a Rendille individual (**Figure 1C**). The Samburu also have low levels of  
368 intermarriage with the Turkana; 3.2% of male Samburu marriages were with a Turkana individual  
369 (**Figure 1C**). For the Borana, none of our sampled individuals report marriages with the Turkana,  
370 Samburu, or Rendille, but did report varying levels of intermarriage between the Borana and  
371 Sakuye, Gabra, Garri, and Somali (**Figure 1C**).

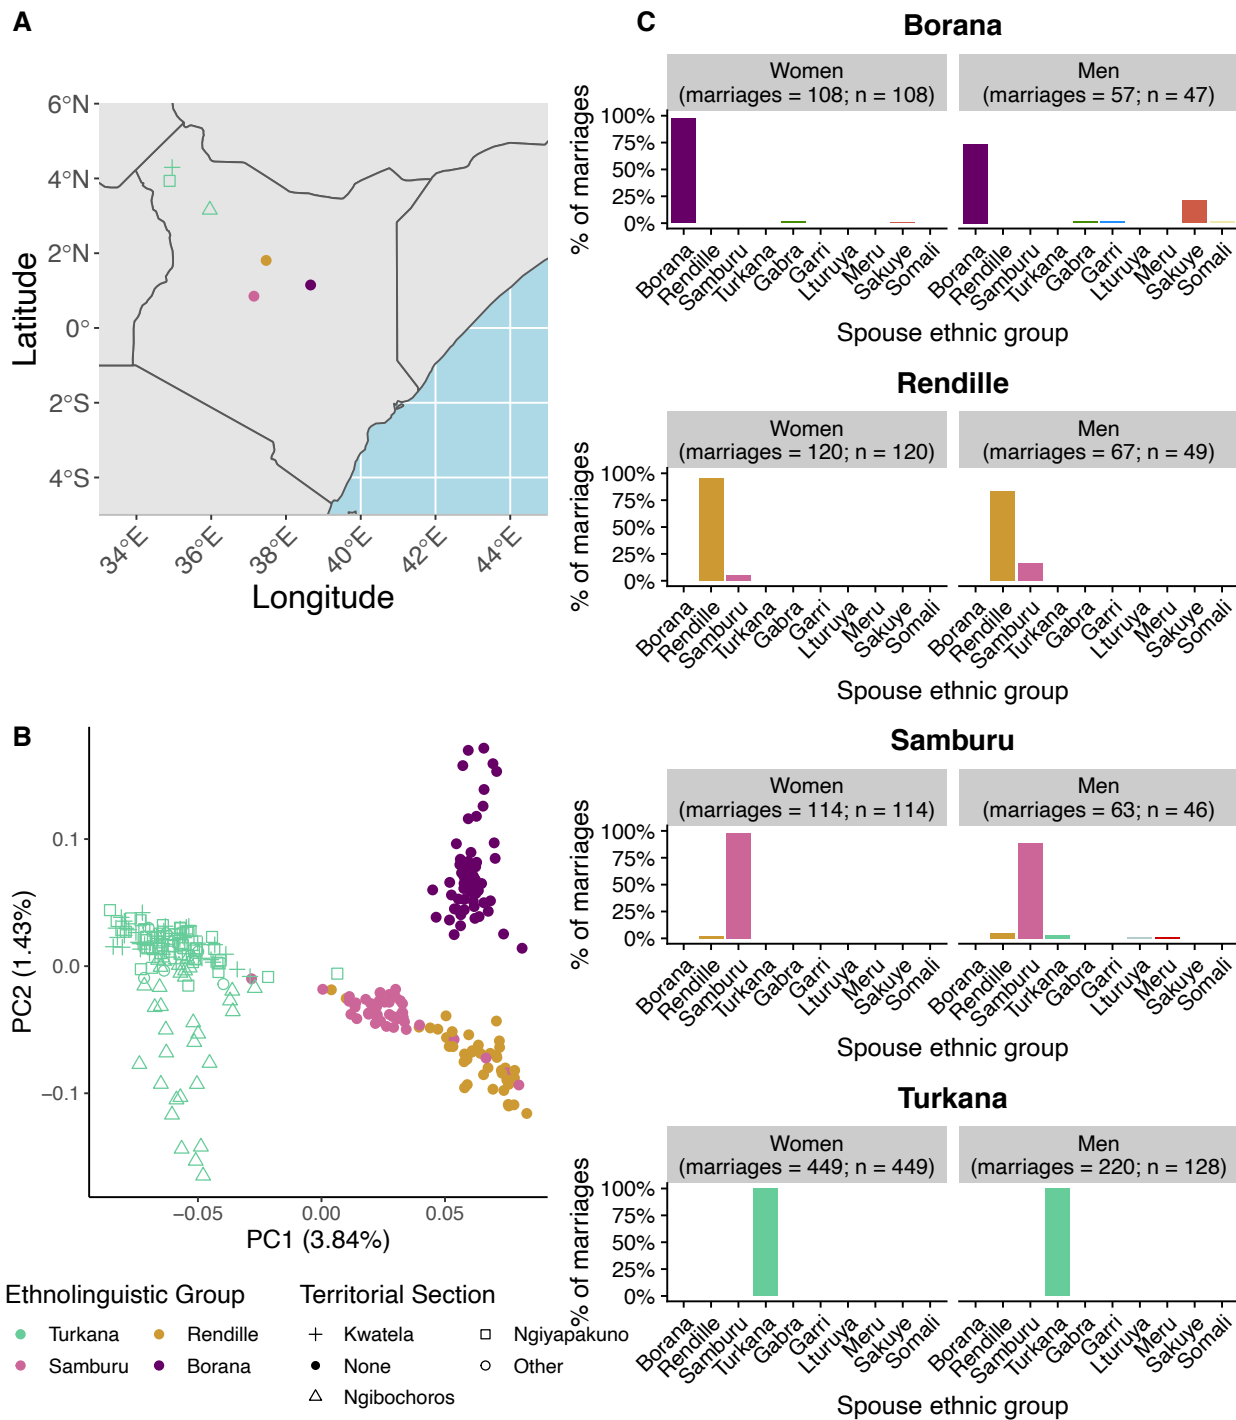

372  
 373 **Figure 1. Intermarriage among ethnolinguistic groups contributes to the clinal pattern of**  
 374 **genetic variation.** Sampling regions, patterns of genetic variation, and rates of intermarriage  
 375 across northern Kenya human populations. A) We sampled 376 individuals across four  
 376 ethnolinguistic groups in northern Kenya and for the Turkana only, we additionally sampled across

377 three territorial sections. B) Autosomal principal components analysis (PCA). C) Rate of  
378 intermarriage across each ethnolinguistic group. Points in A and B represent sampled  
379 ethnolinguistic groups and Turkana territorial sections. Colors represent ethnolinguistic group  
380 affiliation, and shapes represent Turkana territorial section affiliation. Each point in A represents  
381 the geographic location of each sampled group, while the points in B represent individuals.

## 382 The Turkana have additional variation and geography-based 383 substructuring

384 Just as these ethnolinguistic groups are geographically separated and similar to the PCA  
385 (**Figure 1B**), we observed clear genetic separation in ADMIXTURE analyses (**Figure 2A**). In the  
386 ADMIXTURE analyses, each of the ethnolinguistic groups have their own unique ancestry at  $K =$   
387 5 (**Figure 2A**). Interestingly, at  $K = 4$  we observe possible admixture between Samburu and  
388 Rendille (**Figure 2A**).

389 In the Turkana, we additionally found geography-based genetic substructuring based on  
390 territorial region (**Figure 2A; Figure S5**). In the ADMIXTURE analyses, we see substructure  
391 within the Turkana before we see all four ethnolinguistic groups being identified separately. For  
392 example, at  $K = 4$ , the Turkana are characterized by two different ancestries, with one of these  
393 ancestries unique to individuals from the Ngibochoros territorial section (**Figure 2A**). Consistent  
394 with this, in the PCA, we observe variation within the Turkana along PC2 (**Figure 1B**). The  
395 individuals from the Ngibochoros territorial section separate from the other Turkana territorial  
396 sections along PC2. We further calculated genetic differentiation,  $F_{ST}$ , among the three Turkana  
397 territorial sections. We found that  $F_{ST}$  between Ngibochoros and either Kwatela or Ngiyapakuno  
398 are much higher than  $F_{ST}$  between Kwatela and Ngiyapakuno, which are territorial sections that  
399 are both adjacent to each other and distant from the Ngibochoros (**Figure 1A; Figure 2B**).

400 The observed territorial section substructuring in the Turkana may be due to geographic  
 401 separation among the territorial sections. Alternatively, it is possible that individuals from  
 402 Ngibochoros - the territorial section that is closer geographically to the Borana, Samburu, and  
 403 Rendille than the other Turkana territorial sections - may have admixed with the other neighboring  
 404 groups, resulting in the higher genetic differentiation. To investigate these scenarios further, we  
 405 calculated genetic  $F_{ST}$  between each of the Turkana territorial sections and the other three  
 406 ethnolinguistic groups and performed permutation tests to investigate whether  $F_{ST}$  values were  
 407 significantly different between each territorial section and ethnolinguistic group. If gene flow was  
 408 occurring among Ngibochoros and the other three ethnolinguistic groups, we would expect  $F_{ST}$  to  
 409 be lower between Ngibochoros and at least one of the ethnolinguistic groups than between either  
 410 Kwatela or Ngiyapakuno and the same ethnolinguistic groups. What we find, however, is that  $F_{ST}$   
 411 is not significantly different for each of the Turkana territorial sections when compared with each  
 412 of the other ethnolinguistic groups (**Figure 2C**).

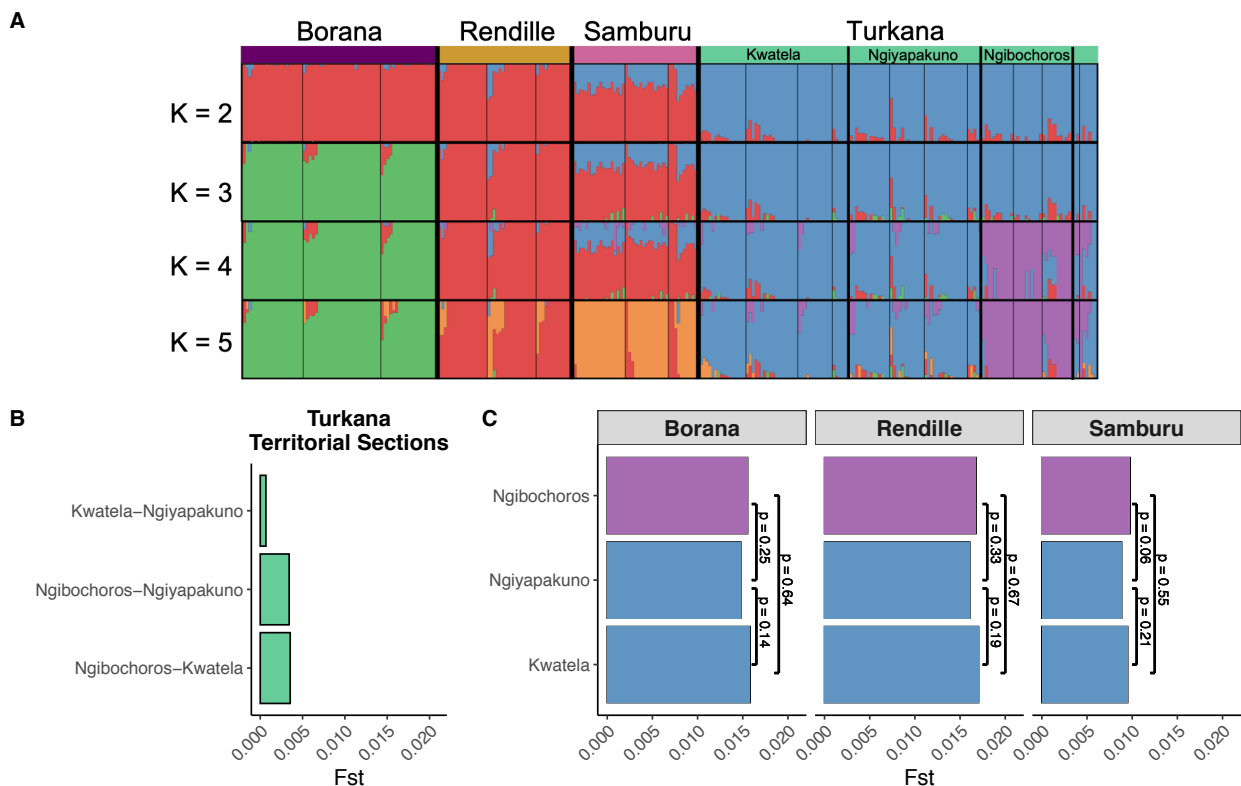

413

414 **Figure 2. The Turkana have additional variation and geography-based substructuring.** A)  
415 ADMIXTURE analysis for 10 replicates of  $K = 2 - 5$  for the autosomes. Each vertical bar represents  
416 an individual, and the colors represent the proportion of ancestry corresponding to  $K$ . Samples  
417 are organized by ethnolinguistic groups (separated by thick black vertical bars), then by Turkana  
418 territorial sections (separated by medium black vertical bars), and lastly by natal clan affiliation  
419 (separated by thin black vertical bars). We observe no substructure based on natal clan affiliation  
420 but do observe geographic substructuring in the Turkana based on territorial section (purple and  
421 blue clusters at  $K = 4$  and 5). B) Autosomal genetic differentiation ( $F_{ST}$ ) among Turkana territorial  
422 sections. Individuals from Ngibochoros territorial section are more genetically different than  
423 individuals from the other sampled territories. C) Autosomal  $F_{ST}$  among each Turkana territorial  
424 section and the other sampled ethnolinguistic groups. We performed a series of pairwise  
425 permutations and found that there is no statistical difference in genetic differentiation among  
426 Turkana territorial sections and ethnolinguistic groups. P-values from the permutation tests are  
427 annotated on the plot.

428 **Y chromosome haplotypes do not consistently cluster by natal clan**  
429 **affiliation**

430 On the Y chromosome - where we expected Y haplotypes to be more similar for males  
431 from the same clan in groups with patrilineal descent than in different clans - we found that  
432 haplotypes do not consistently cluster by natal clan affiliation. For Turkana and Borana, there are  
433 no haplotypes unique to a clan (**Figure 3A, 3D**). For the Samburu, most of the haplotypes cluster  
434 by natal clan affiliation, with the exception of one haplotype that is shared among individuals from  
435 both clans we sampled (**Figure 3B**). For the Rendille we observed one haplotype unique to  
436 individuals from the Ldupsai clan, however, the rest of the haplotypes were shared among clans  
437 (**Figure 3C**). We observe similar characteristics in the mitochondrial DNA haplotype networks

438 (Figure S6). Overall, within these patrilineal descent groups, Y chromosome haplotypes generally  
439 do not cluster by natal clan affiliation.

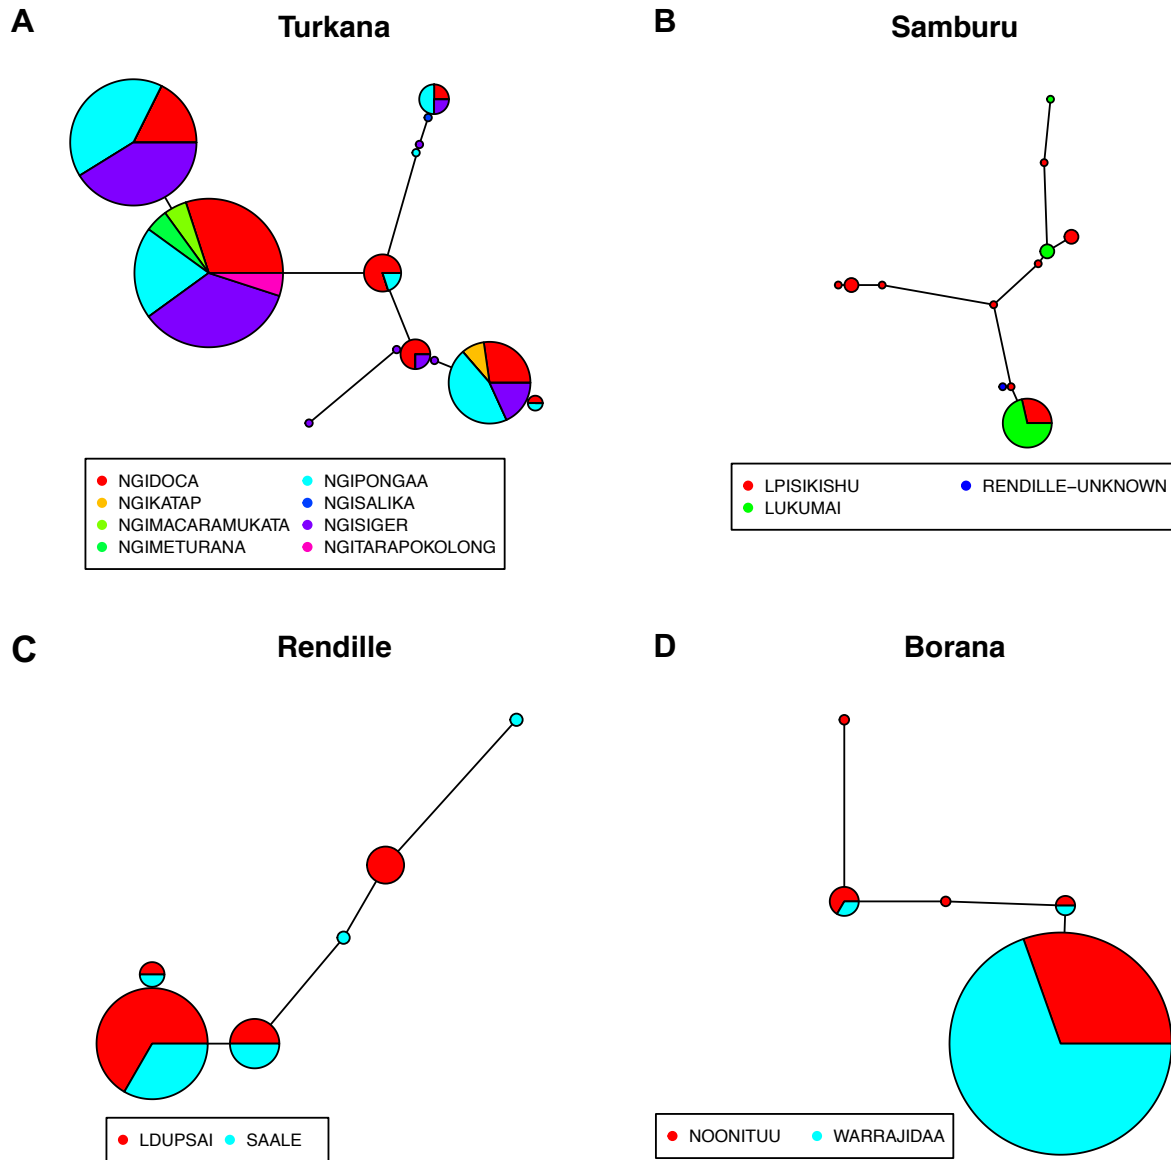

440

441 **Figure 3. Y chromosome haplotypes do not consistently cluster by natal clan affiliation.**

442 Haplotype networks constructed from Y chromosome SNP data from A) Turkana, B) Samburu,

443 C) Rendille and D) Borana male samples. The size of each node (circle) is proportional to the

444 number of samples in the node (larger nodes have more samples and smallest nodes have 1

445 sample). Colors within each node represent natal clan affiliation corresponding to the key in each

446 panel.

## 447 Genetic differentiation is driven by physical separation, not cultural 448 processes

449 Ethnolinguistic groups that are geographically closer typically had lower genetic  $F_{ST}$   
450 (**Figure 4**). The lowest genetic  $F_{ST}$  was found between the Samburu and Rendille yet they speak  
451 languages from different language families; individuals from these ethnolinguistic groups are  
452 closer geographically to each other than to any other ethnolinguistic group. The Turkana sampled  
453 here are, on average, furthest geographically from the other ethnolinguistic groups - ranging from  
454 286 km to 439 km away. The Turkana also have much higher genetic  $F_{ST}$  values with the Rendille,  
455 Borana, and Samburu than  $F_{ST}$  measured between any two comparisons of the Rendille, Borana,  
456 and Samburu (**Figure 4**).

457 For some groups, the pattern of genetic differentiation secondarily paralleled linguistic  
458 relationships. Among the Turkana genetic  $F_{ST}$  comparisons, genetic  $F_{ST}$  between Turkana and  
459 Samburu - both Nilo-Saharan speakers - is about two times lower than genetic  $F_{ST}$  between the  
460 Turkana and Rendille, even though the Rendille individuals sampled here are closer to Turkana  
461 by about 63 km (**Figure 4**).

462 We find that cultural differentiation does not predict genetic differentiation among  
463 neighboring groups in northern Kenya. Genetic  $F_{ST}$  and cultural  $F_{ST}$  are not significantly correlated  
464 with each other ( $R = 0.63$ ,  $p$ -value = 0.18; **Figure 5**; **Figure S7**). However, we observe a  
465 significant positive correlation between genetic  $F_{ST}$  and geographic distance both at the  
466 ethnolinguistic group level and also Turkana territorial section level (ethnolinguistic group level:  $R$   
467 = 0.82,  $p$ -value = 0.048; Turkana territorial section level:  $R = 0.992$ ,  $p$ -value = <0.001; **Figure 5**;  
468 **Figure S7**).

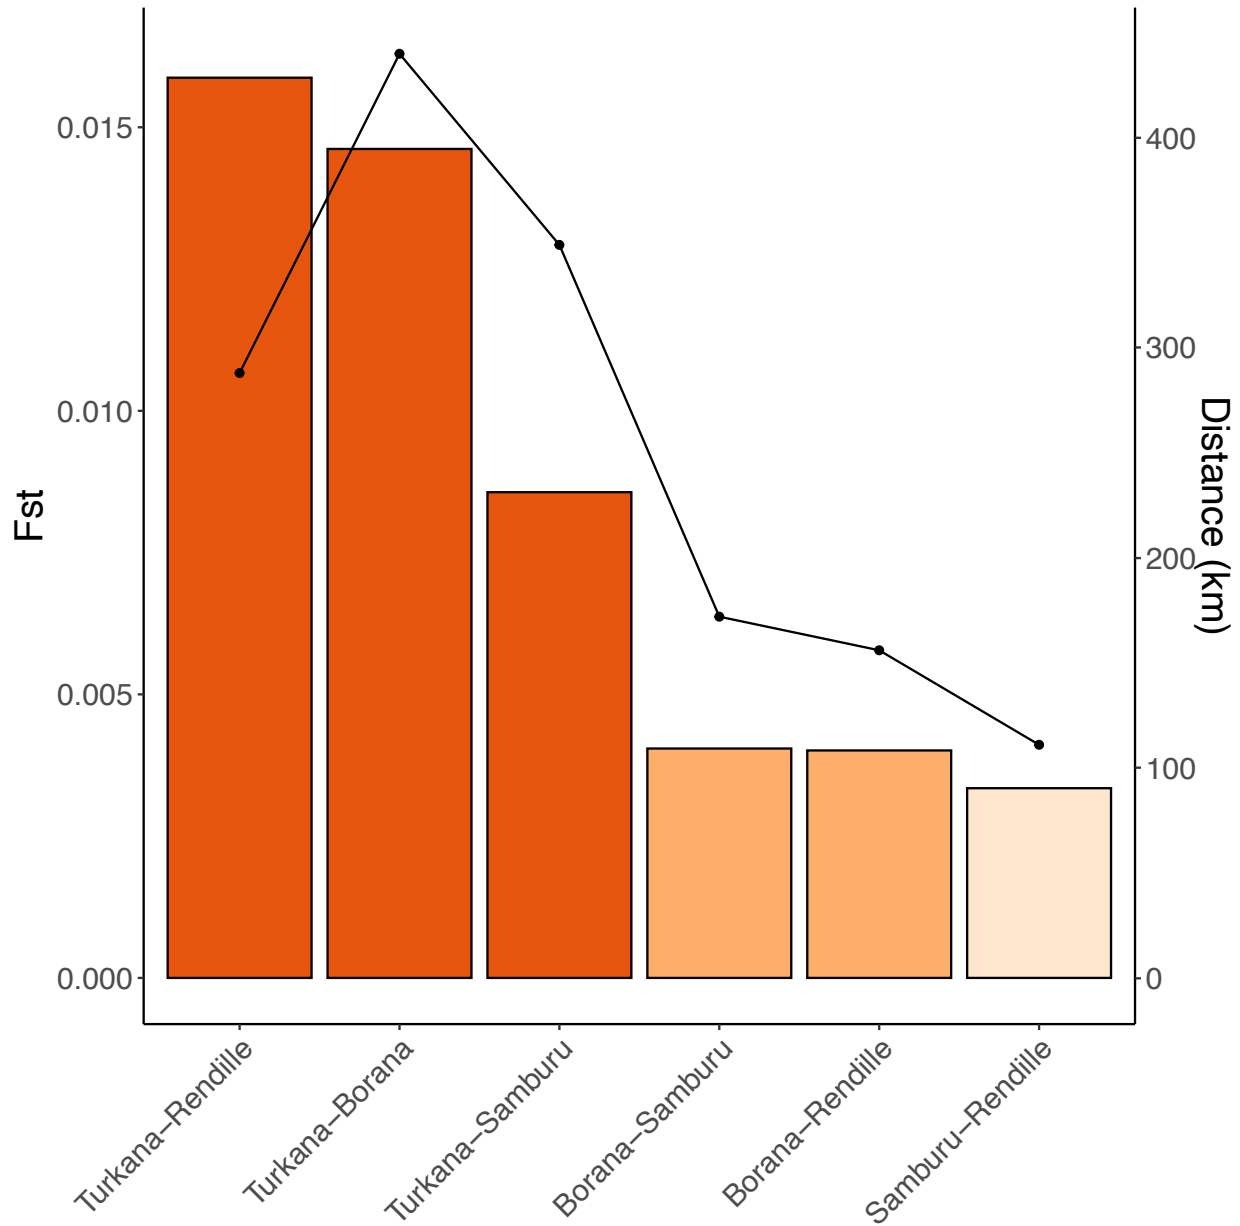

469

470 **Figure 4. Geography primarily impacts patterns of genetic differentiation among**  
471 **ethnolinguistic groups but for some groups, the pattern of genetic differentiation**  
472 **secondarily parallels linguistic relationships.** We calculated autosomal  $F_{ST}$  among  
473 ethnolinguistic groups. Bars are ordered by  $F_{ST}$ . Dark orange (left) are groups furthest  
474 geographically, while the lighter orange bars are groups closest geographically. The Samburu  
475 and Rendille (pale orange) are two neighboring groups that speak languages from different



476 language families, yet have the lowest genetic  $F_{ST}$  observed in our study. Line graph corresponds  
477 to the geographic distance between each pair of ethnolinguistic groups.  
478

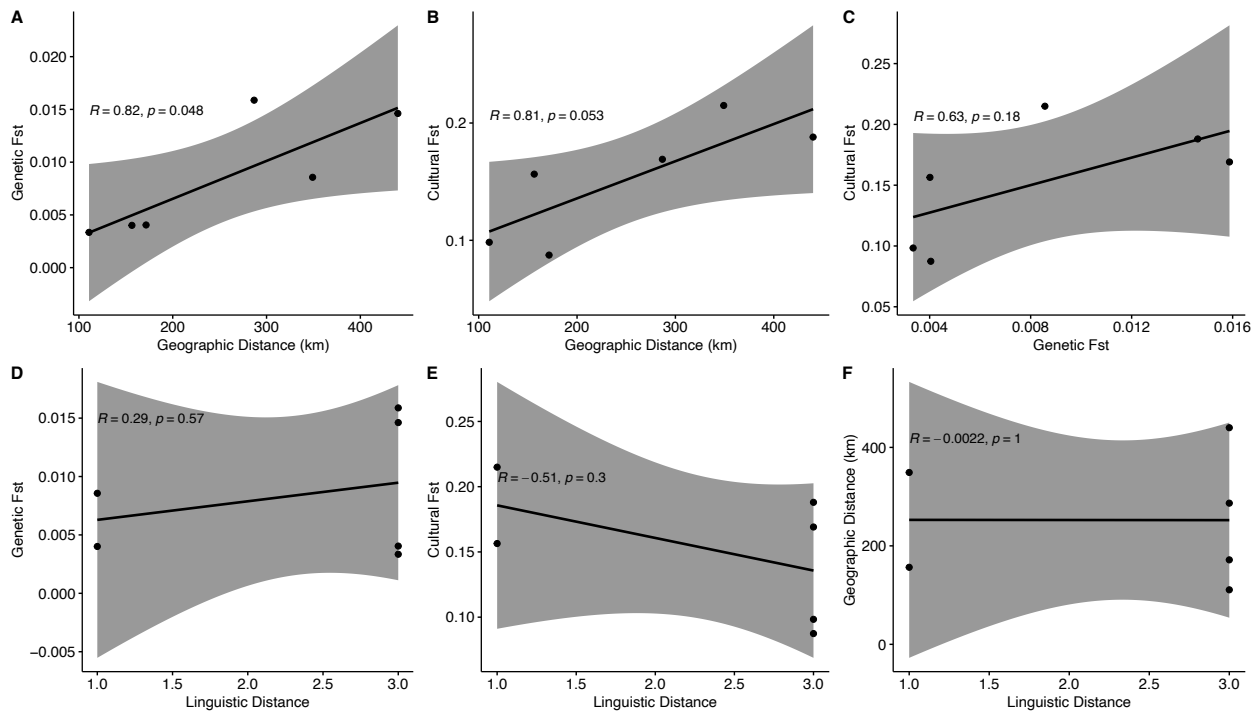

479  
480 **Figure 5. Cultural differentiation does not predict genetic differentiation among human**  
481 **ethnolinguistic groups in northern Kenya.** We performed a series of Pearson's correlations to  
482 explore whether cultural differentiation may impact genetic  $F_{ST}$ . Pearson correlations for A)  
483 genetic  $F_{ST}$  and geographic distance, B) cultural  $F_{ST}$  and geographic distance, C) genetic  $F_{ST}$  and  
484 cultural  $F_{ST}$ , D) genetic  $F_{ST}$  and linguistic distance, E) cultural  $F_{ST}$  and linguistic distance, and F)  
485 geographic distance and linguistic distance. R corresponds to the correlation coefficient; p  
486 corresponds to the p-value.

## 487 Discussion

488 In this study, we generated genome-wide SNP genotype data and investigated the extent  
489 to which geographic and cultural processes shape genetic variation within and among four

490 pastoral populations in northern Kenya. We sampled across multiple layers of social organization  
491 - ethnolinguistic groups, clans, and territorial sections - finding that geography, rather than cultural  
492 processes, predominantly shape patterns of genetic variation in northern Kenya.

493         Among ethnolinguistic groups, we observed a clinal pattern of variation with a lack of  
494 discrete clustering, particularly between the Rendille and Samburu, and comparatively high levels  
495 of intermarriage between them. These results suggest ongoing gene flow between the Rendille  
496 and Samburu, the two most closely geographically located groups, but not the most culturally  
497 similar. Previous literature has noted intermarriage between the Rendille and Samburu (Spencer,  
498 2012) and relatively higher levels of cooperation (Handley & Mathew, 2020). Genetic clustering  
499 of Cushitic and Nilo-Saharan speaking groups (of which the Rendille and Samburu are a part of,  
500 respectively) has previously been observed, supporting evidence of gene flow between these  
501 larger linguistic groups (Tishkoff et al., 2009). Our findings confirm previous genetic and cultural  
502 observations and provide an example in humans where genes are shared between different  
503 ethnolinguistic groups at a local geographic scale.

504         Though we found a clinal pattern of variation, the Waso Borana and Turkana formed fairly  
505 discrete clusters of unique genetic variation. Strikingly, in the individuals we sampled, no  
506 intermarriage was reported in the Turkana at all, and for Waso Borana, there was no intermarriage  
507 with the other three ethnolinguistic groups. These results suggest isolation in Waso Borana and  
508 Turkana from the ethnolinguistic groups sampled in this study. However, it is possible our  
509 sampling locations may be driving part of these observations. The regions that the Waso Borana  
510 inhabit border the other ethnolinguistic groups; however, we sampled individuals from the Merti  
511 region, which is an interior region of the Waso Borana territory. Likewise, the Turkana individuals  
512 we sampled were from the north and west regions of Turkana that do not directly border the other  
513 groups. We speculate that although these are nomadic groups that can traverse large distances,  
514 intermixing may occur in boundary regions rather than in interior regions. Future studies including  
515 individuals from both interior and border regions may shed light on this.

516           Perhaps one of the most intriguing results in this study was the observed genetic  
517           substructuring within Turkana based on territorial section affiliation. Individuals from the  
518           Ngibochoros territorial section are further geographically from the individuals sampled from the  
519           other territorial sections, and our results suggest that this geographic separation results in high  
520           genetic differentiation between individuals from Ngibochoros with individuals from Kwatela and  
521           Ngiyapakuno. Because there is no cultural barrier to Turkana individuals marrying individuals from  
522           different territorial sections (i.e., clan level exogamy) and because there is extensive migration in  
523           dry season across territorial section boundaries in these nomadic groups, we did not expect to  
524           observe genetic substructuring within the Turkana. Rather, we were expecting the Turkana to be  
525           largely homogenous, similar to what we observed within the other three ethnolinguistic groups we  
526           sampled in this study. The Turkana are however the most populous of the four ethnic groups,  
527           numbering approximately 1 million individuals, and having the largest geographic span. It is  
528           possible that although there is a shared cultural identity over this larger area, interpersonal  
529           interactions and co-mingling between distant Turkana territorial sections are limited. Genetic  
530           substructuring has been observed across humans on larger geographic scales (i.e., (Alsmadi et  
531           al., 2013; Bryc et al., 2010; Jakkula et al., 2008; Salmela et al., 2011; Tian et al., 2008; Tishkoff  
532           et al., 2009; Xu et al., 2009)); however, due to a lack of dense sampling within individual  
533           populations across Africa, genetic substructuring within a single ethnolinguistic group has not  
534           been widely observed within the continent, nor indeed within as small of a region as we investigate  
535           here. Because underlying genetic structure can have implications for case-control studies (Price,  
536           Zaitlen, Reich, & Patterson, 2010), our results highlight the importance of accounting for fine-  
537           scale substructuring in future genomic studies, particularly with the Turkana, and emphasize the  
538           continued importance of characterizing genetic structure across globally diverse human  
539           populations.

540           Within ethnolinguistic groups, we found that Y chromosome haplotypes do not consistently  
541           cluster by natal clan affiliation, suggesting that patrilineality may not have a strong impact on

542 patterns of male-specific genetic variation in northern Kenya pastoral populations. Previous  
543 research has found that, in groups with patrilineal descent, like pastoralists in Central Asia (Chaix  
544 et al., 2007) and the Bimoba in Ghana (Sanchez-Faddeev et al., 2013), males from the same clan  
545 have identical or similar Y haplotypes. However, this is not always the case, as seen in tribal  
546 Yemen, where Y haplotypes do not clearly cluster by clan (Raaum, Al-Meerri, & Mulligan, 2013).  
547 A possible explanation for our finding is that cultural conception of fatherhood, and therefore clan  
548 affiliation, does not always correspond with who one's biological father is. For example, in these  
549 groups, offspring from unofficial marriages - unions in which the bride price has not been paid -  
550 take on their mother's clan. This would result in a mismatch in clan assignment for these offspring.  
551 Adoption can also result in a mismatch in clan affiliation. Adoption is known to occur in Turkana  
552 and an adopted child takes on the clan of their adopted father. Overall, these results highlight that  
553 patrilineal descent groups do not always correspond with genetic patriline.

554 We found that genetic differentiation was highest between ethnolinguistic groups  
555 separated by the largest geographic distances, suggesting that geography primarily impacts  
556 patterns of genetic differentiation among northern Kenyan populations. Previous studies of  
557 genetic structure among human populations in Africa have found correspondence between  
558 genetic structure and linguistic affiliation and/or geography, with some studies reporting  
559 correspondence of genetic structure predominantly with linguistic affiliations (Bryc et al., 2010;  
560 Tishkoff et al., 2009), while others found that patterns of genetic structure predominantly mirror  
561 geography and ecological barriers (Babiker, Schlebusch, Hassan, & Jakobsson, 2011; Uren et  
562 al., 2016). For northern Kenyan human populations, our results suggest that geography primarily  
563 shapes the observed patterns of genetic differentiation.

564 Though genetic differentiation primarily paralleled geographic distances, for some groups  
565 in our study, the pattern of genetic differentiation secondarily paralleled linguistic relationships.  
566 Specifically, we found that Turkana and Samburu had lower  $F_{ST}$  than the Turkana and Rendille,  
567 despite the former being geographically more distant from one another than Turkana and

568 Rendille. The close genetic relationship between Turkana and Samburu compared to Turkana  
569 and Rendille could be due to shared Nilo-Saharan ancestry between the Turkana and Samburu  
570 but could also be the result of sampling from areas not directly bordering each group. Although  
571 not commonplace, the Turkana are known to intermarry with both the Rendille and Samburu, and  
572 likely occurs in regions bordering each group. Given our sampling strategy, we were unable to  
573 assess the extent of gene flow in regions directly bordering each group and if this differs from  
574 interior regions. Therefore, though our results suggest that patterns of genetic differentiation may  
575 be secondarily influenced by local linguistic affiliations for populations with similar geographic  
576 distances, additional sampling across the entire region of each ethnolinguistic group may be  
577 needed to validate this finding.

578         Lastly, we found that cultural differentiation does not predict genetic differentiation among  
579 neighboring populations in northern Kenya. Previous studies have used and compared linguistic  
580 or cultural distance to genetic distance to understand the extent to which genes and  
581 culture/language travel among human populations, with examples in human history where genes  
582 and culture/language have been shown to travel together (i.e., (Filippo, de Filippo, Bostoen,  
583 Stoneking, & Pakendorf, 2012; Hewlett, De Silvestri, & Guglielmino, 2002; Hunley et al., 2008;  
584 Karafet et al., 2016; Lansing et al., 2007)) and others where spoken language has been shown  
585 to have no effect on genetic structure (Veeramah et al., 2010). Here, we used cultural  $F_{ST}$  to test  
586 whether genes and culture travel together on a local geographic scale and find that cultural  $F_{ST}$   
587 and genetic  $F_{ST}$  are not correlated with each other among northern Kenya pastoralists. We caution  
588 against the overinterpretation of this result, however, due to the limited number of groups sampled  
589 here. We anticipate this metric of cultural similarity will be of interest for future studies aimed at  
590 assessing questions of the movement of genes and culture in humans on both larger and local  
591 geographic scales. Taken together with the other results in this study, our findings suggest that  
592 geographic proximity, not cultural similarity, may provide a better explanation for the observed  
593 patterns of genetic variation among these groups.

## 594 Acknowledgments

595 This work was funded by the John Templeton Foundation (grant no. 48952) to SM, the National  
596 Institute of General Medical Sciences of the National Institutes of Health R35GM124827 to MAW,  
597 and The Graduate College at Arizona State University, Achievement Rewards for College  
598 Scientists (ARCS) Foundation Phoenix Chapter as a Pierson Scholar, and Arizona State  
599 University Chapter Sigma Xi to AMTO. The authors acknowledge Research Computing at Arizona  
600 State University for providing high-performance computing resources that have contributed to the  
601 research results. The National Museums of Kenya provided institutional support to conduct the  
602 research in Kenya. We thank our field research assistants for translating the questionnaires and  
603 aiding with data collection: Ekiru Carlystus, Amuria Lotiira, Chegem Muya, Gilbert Topos, Dismas  
604 Lomelu, Mohamed Noor Guyo, Abdi Wario, Paul Leramato, Damaris Lekilau, Julius Longonyek,  
605 Sinyati Lesowapir, Rafael Letele, Simon Harugura, Benson Morsa, Ejere Ballo, and Lebo Parkeri.  
606 We also thank our participants and host communities for their hospitality and for their continued  
607 support in this project.

## 608 Declaration of Interests

609 The authors declare no competing interests.

## 610 Authors Contributions

611 AMTO, CH, ACS, SM, and MAW conceived the study. AMTO and MAW designed the  
612 methodology. SM and CH collected the samples and demographic data. AMTO and EKH  
613 extracted DNA and prepared samples for genotyping. SM, CH, and AMTO processed and cleaned  
614 the demographic data. AMTO performed all formal analyses and led the writing of the manuscript.

615 All authors contributed critically to writing and editing the drafts and gave final approval for  
616 publication.

## 617 References

- 618 1000 Genomes Project Consortium, Auton, A., Brooks, L. D., Durbin, R. M., Garrison, E. P., Kang,  
619 H. M., ... Abecasis, G. R. (2015). A global reference for human genetic variation. *Nature*,  
620 526(7571), 68–74.
- 621 Alexander, D. H., Novembre, J., & Lange, K. (2009). Fast model-based estimation of ancestry in  
622 unrelated individuals. *Genome Research*, 19(9), 1655–1664.
- 623 Alsmadi, O., Thareja, G., Alkayal, F., Rajagopalan, R., John, S. E., Hebbar, P., ... Thanaraj, T. A.  
624 (2013). Genetic substructure of Kuwaiti population reveals migration history. *PloS One*,  
625 8(9), e74913.
- 626 Babiker, H. M., Schlebusch, C. M., Hassan, H. Y., & Jakobsson, M. (2011). Genetic variation and  
627 population structure of Sudanese populations as indicated by 15 Identifiler sequence-  
628 tagged repeat (STR) loci. *Investigative Genetics*, 2(1), 12.
- 629 Behr, A. A., Liu, K. Z., Liu-Fang, G., Nakka, P., & Ramachandran, S. (2016). pong: fast analysis  
630 and visualization of latent clusters in population genetic data. *Bioinformatics* , 32(18),  
631 2817–2823.
- 632 Bell, A. V., Richerson, P. J., & McElreath, R. (2009). Culture rather than genes provides greater  
633 scope for the evolution of large-scale human prosociality. *Proceedings of the National  
634 Academy of Sciences of the United States of America*, 106(42), 17671–17674.
- 635 Bhatia, G., Patterson, N., Sankararaman, S., & Price, A. L. (2013). Estimating and interpreting  
636 FST: the impact of rare variants. *Genome Research*, 23(9), 1514–1521.
- 637 Bose, A., Platt, D. E., Parida, L., Drineas, P., & Paschou, P. (2021). Integrating Linguistics, Social  
638 Structure, and Geography to Model Genetic Diversity within India. *Molecular Biology and*

- 639           *Evolution*. doi:10.1093/molbev/msaa321
- 640 Bryc, K., Auton, A., Nelson, M. R., Oksenberg, J. R., Hauser, S. L., Williams, S., ... Bustamante,  
641 C. D. (2010). Genome-wide patterns of population structure and admixture in West  
642 Africans and African Americans. *Proceedings of the National Academy of Sciences of the*  
643 *United States of America*, 107(2), 786–791.
- 644 Cavalli-Sforza, L. L., Piazza, A., Menozzi, P., & Mountain, J. (1988). Reconstruction of human  
645 evolution: bringing together genetic, archaeological, and linguistic data. *Proceedings of*  
646 *the National Academy of Sciences*, Vol. 85, pp. 6002–6006. doi:10.1073/pnas.85.16.6002
- 647 Chaix, R., Quintana-Murci, L., Hegay, T., Hammer, M. F., Mobasher, Z., Austerlitz, F., & Heyer,  
648 E. (2007). From social to genetic structures in central Asia. *Current Biology: CB*, 17(1),  
649 43–48.
- 650 Chang, C. C., Chow, C. C., Tellier, L. C., Vattikuti, S., Purcell, S. M., & Lee, J. J. (2015). Second-  
651 generation PLINK: rising to the challenge of larger and richer datasets. *GigaScience*, 4, 7.
- 652 Choudhury, A., TrypanoGEN Research Group, Aron, S., Botigué, L. R., Sengupta, D., Botha, G.,  
653 ... H3Africa Consortium. (2020). High-depth African genomes inform human migration and  
654 health. *Nature*, Vol. 586, pp. 741–748. doi:10.1038/s41586-020-2859-7
- 655 Filippo, C. de, de Filippo, C., Bostoen, K., Stoneking, M., & Pakendorf, B. (2012). Bringing  
656 together linguistic and genetic evidence to test the Bantu expansion. *Proceedings of the*  
657 *Royal Society B: Biological Sciences*, Vol. 279, pp. 3256–3263.  
658 doi:10.1098/rspb.2012.0318
- 659 Gurdasani, D., Carstensen, T., Tekola-Ayele, F., Pagani, L., Tachmazidou, I., Hatzikotoulas, K.,  
660 ... Sandhu, M. S. (2015). The African Genome Variation Project shapes medical genetics  
661 in Africa. *Nature*, 517(7534), 327–332.
- 662 Handley, C., & Mathew, S. (2020). Human large-scale cooperation as a product of competition  
663 between cultural groups. *Nature Communications*, Vol. 11. doi:10.1038/s41467-020-  
664 14416-8



- 665 Hewlett, B. S., De Silvestri, A., & Guglielmino, C. R. (2002). Semes and Genes in Africa. *Current*  
666 *Anthropology*, 43(2), 313–321.
- 667 Heyer, E., Balaesque, P., Jobling, M. A., Quintana-Murci, L., Chaix, R., Segurel, L., ... Hegay, T.  
668 (2009). Genetic diversity and the emergence of ethnic groups in Central Asia. *BMC*  
669 *Genetics*, 10, 49.
- 670 Hudson, R. R., Slatkin, M., & Maddison, W. P. (1992). Estimation of levels of gene flow from DNA  
671 sequence data. *Genetics*, 132(2), 583–589.
- 672 Hunley, K., Dunn, M., Lindström, E., Reesink, G., Terrill, A., Healy, M. E., ... Friedlaender, J. S.  
673 (2008). Genetic and linguistic coevolution in Northern Island Melanesia. *PLoS Genetics*,  
674 4(10), e1000239.
- 675 Jakkula, E., Rehnström, K., Varilo, T., Pietiläinen, O. P. H., Paunio, T., Pedersen, N. L., ...  
676 Peltonen, L. (2008). The genome-wide patterns of variation expose significant  
677 substructure in a founder population. *American Journal of Human Genetics*, 83(6), 787–  
678 794.
- 679 Karafet, T. M., Bulayeva, K. B., Nichols, J., Bulayev, O. A., Gurganova, F., Omarova, J., ...  
680 Hammer, M. F. (2016). Coevolution of genes and languages and high levels of population  
681 structure among the highland populations of Daghestan. *Journal of Human Genetics*,  
682 61(3), 181–191.
- 683 Kebathi, J. N. (2008). Measuring Literacy: The Kenya National Adult Literacy Survey. *Adult*  
684 *Education and Development*, 71.
- 685 Kim, S. (2015). ppcor: An R Package for a Fast Calculation to Semi-partial Correlation  
686 Coefficients. *Communications for Statistical Applications and Methods*, 22(6), 665–674.
- 687 Lansing, J. S., Cox, M. P., Downey, S. S., Gabler, B. M., Hallmark, B., Karafet, T. M., ... Hammer,  
688 M. F. (2007). Coevolution of languages and genes on the island of Sumba, eastern  
689 Indonesia. *Proceedings of the National Academy of Sciences of the United States of*  
690 *America*, 104(41), 16022–16026.

- 691 Manica, A., Prugnolle, F., & Balloux, F. (2005). Geography is a better determinant of human  
692 genetic differentiation than ethnicity. *Human Genetics*, 118(3–4), 366–371.
- 693 Marchi, N., Hegay, T., Menecier, P., Georges, M., Laurent, R., Whitten, M., ... Heyer, E. (2017).  
694 Sex-specific genetic diversity is shaped by cultural factors in Inner Asian human  
695 populations. *American Journal of Physical Anthropology*, 162(4), 627–640.
- 696 Mulindwa, J., Noyes, H., Ilboudo, H., Pagani, L., Nyangiri, O., Kimuda, M. P., ... TrypanoGEN  
697 Research Group of the H3Africa Consortium. (2020). High Levels of Genetic Diversity  
698 within Nilo-Saharan Populations: Implications for Human Adaptation. *American Journal of*  
699 *Human Genetics*, 107(3), 473–486.
- 700 Nettle, D., & Harriss, L. (2003). Genetic and linguistic affinities between human populations in  
701 Eurasia and West Africa. *Human Biology*, 75(3), 331–344.
- 702 Novembre, J., Johnson, T., Bryc, K., Kutalik, Z., Boyko, A. R., Auton, A., ... Bustamante, C. D.  
703 (2008). Genes mirror geography within Europe. *Nature*, 456(7218), 98–101.
- 704 Pagani, L., Kivisild, T., Tarekegn, A., Ekong, R., Plaster, C., Gallego Romero, I., ... Tyler-Smith,  
705 C. (2012). Ethiopian genetic diversity reveals linguistic stratification and complex  
706 influences on the Ethiopian gene pool. *American Journal of Human Genetics*, 91(1), 83–  
707 96.
- 708 Paradis, E. (2010). pegas: an R package for population genetics with an integrated–modular  
709 approach. *Bioinformatics*, 26(3), 419–420.
- 710 Paradis, E., & Schliep, K. (2019). ape 5.0: an environment for modern phylogenetics and  
711 evolutionary analyses in R. *Bioinformatics*, 35(3), 526–528.
- 712 Price, A. L., Patterson, N. J., Plenge, R. M., Weinblatt, M. E., Shadick, N. A., & Reich, D. (2006).  
713 Principal components analysis corrects for stratification in genome-wide association  
714 studies. *Nature Genetics*, 38(8), 904–909.
- 715 Price, A. L., Zaitlen, N. A., Reich, D., & Patterson, N. (2010). New approaches to population  
716 stratification in genome-wide association studies. *Nature Reviews. Genetics*, 11(7), 459–

- 717 463.
- 718 Raaum, R. L., Al-Meerri, A., & Mulligan, C. J. (2013). Culture modifies expectations of kinship and  
719 sex-biased dispersal patterns: a case study of patrilineality and patrilocality in tribal  
720 Yemen. *American Journal of Physical Anthropology*, 150(4), 526–538.
- 721 Ramachandran, S., Deshpande, O., Roseman, C. C., Rosenberg, N. A., Feldman, M. W., &  
722 Cavalli-Sforza, L. L. (2005). Support from the relationship of genetic and geographic  
723 distance in human populations for a serial founder effect originating in Africa. *Proceedings*  
724 *of the National Academy of Sciences of the United States of America*, 102(44), 15942–  
725 15947.
- 726 Salmela, E., Lappalainen, T., Liu, J., Sistonen, P., Andersen, P. M., Schreiber, S., ... Kere, J.  
727 (2011). Swedish population substructure revealed by genome-wide single nucleotide  
728 polymorphism data. *PloS One*, 6(2), e16747.
- 729 Sanchez-Faddeev, H., Pijpe, J., van der Hulle, T., Meij, H. J., van der Gaag, K. J., Slagboom, P.  
730 E., ... de Knijff, P. (2013). The influence of clan structure on the genetic variation in a  
731 single Ghanaian village. *European Journal of Human Genetics: EJHG*, 21(10), 1134–  
732 1139.
- 733 Spencer, P. (2012). *Nomads in alliance: symbiosis and growth among the Rendille and Samburu*  
734 *of Kenya*. Retrieved from  
735 <http://eprints.soas.ac.uk/20803/1/NOMADS%20IN%20ALLIANCE%202012.pdf>
- 736 Sun, H., Zhou, C., Huang, X., Liu, S., Lin, K., Yu, L., ... Yang, Z. (2013). Correlation between the  
737 linguistic affinity and genetic diversity of Chinese ethnic groups. *Journal of Human*  
738 *Genetics*, 58(10), 686–693.
- 739 Team, R. C., & Others. (2013). *R: A language and environment for statistical computing*.  
740 Retrieved from  
741 <http://citeseerx.ist.psu.edu/viewdoc/download?doi=10.1.1.470.5851&rep=rep1&type=pdf>
- 742 Team, R., & Others. (2015). RStudio: integrated development for R. *RStudio, Inc.*, Boston, MA

- 743 URL [Http://Www. Rstudio. Com](http://www.Rstudio.com), 42, 14.
- 744 Tian, C., Kosoy, R., Lee, A., Ransom, M., Belmont, J. W., Gregersen, P. K., & Seldin, M. F. (2008).  
745 Analysis of East Asia genetic substructure using genome-wide SNP arrays. *PloS One*,  
746 3(12), e3862.
- 747 Tishkoff, S. A., Reed, F. A., Friedlaender, F. R., Ehret, C., Ranciaro, A., Froment, A., ... Williams,  
748 S. M. (2009). The genetic structure and history of Africans and African Americans.  
749 *Science*, 324(5930), 1035–1044.
- 750 Uren, C., Kim, M., Martin, A. R., Bobo, D., Gignoux, C. R., van Helden, P. D., ... Henn, B. M.  
751 (2016). Fine-Scale Human Population Structure in Southern Africa Reflects  
752 Ecogeographic Boundaries. *Genetics*, 204(1), 303–314.
- 753 Veeramah, K. R., Connell, B. A., Ansari Pour, N., Powell, A., Plaster, C. A., Zeitlyn, D., ... Thomas,  
754 M. G. (2010). Little genetic differentiation as assessed by uniparental markers in the  
755 presence of substantial language variation in peoples of the Cross River region of Nigeria.  
756 *BMC Evolutionary Biology*, 10, 92.
- 757 WALS Online - Home. (n.d.). Retrieved September 23, 2021, from <https://wals.info/>
- 758 Wickham, H. (2011). ggplot2. *Wiley Interdisciplinary Reviews: Computational Statistics*, 3(2),  
759 180–185.
- 760 Xu, S., Kangwanpong, D., Seielstad, M., Srikumool, M., Kampuansai, J., Jin, L., & HUGO Pan-  
761 Asian SNP Consortium. (2010). Genetic evidence supports linguistic affinity of Mlabri—a  
762 hunter-gatherer group in Thailand. *BMC Genetics*, 11, 18.
- 763 Xu, S., Yin, X., Li, S., Jin, W., Lou, H., Yang, L., ... Jin, L. (2009). Genomic dissection of population  
764 substructure of Han Chinese and its implication in association studies. *American Journal*  
765 *of Human Genetics*, 85(6), 762–774.
- 766
